# Supplementary material
Source: PubMed Central journal article supplement (PMC2685968)

**DsRed siRNA**

**GFP**

**A**

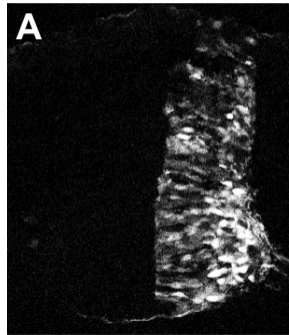

**Nolz1**

**B**

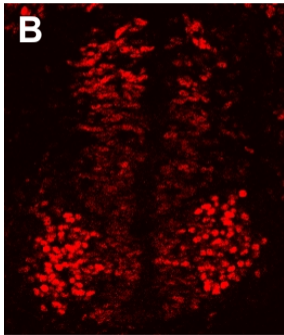

**Nolz1.Isl1/2**

**C**

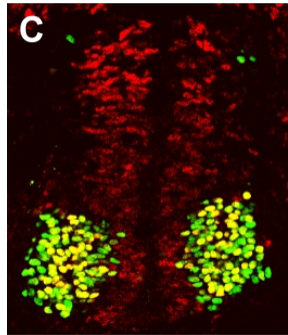

Supplement: dev.028043_1.pdf [file dev.028043_1.pdf]

**Nolz1****Lim3**.**Isl1/2****HB9**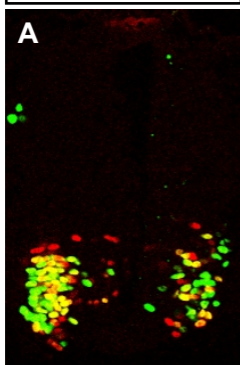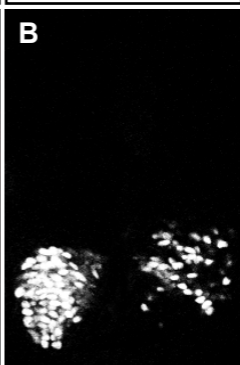**Grg5****Lim3**.**Isl1/2****HB9**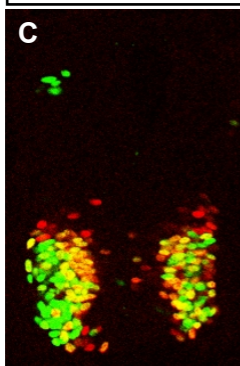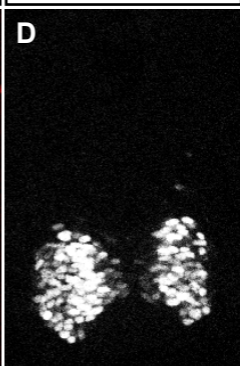**Nolz1****Grg5****Hoxc6**.**Nolz1**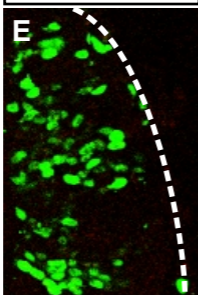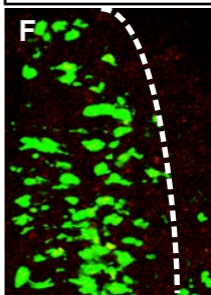

Supplement: dev.028043_2.pdf [file dev.028043_2.pdf]
